# Supplementary material for: An optimized Nurr1 agonist provides disease-modifying effects in Parkinson’s disease models
Source: PubMed Central journal article supplement (PMC10354055; doi:10.1038/s41467-023-39970-9), 2023-07-18
Supplement: 41467_2023_39970_MOESM1_ESM.pdf [file 41467_2023_39970_MOESM1_ESM.pdf]

# Supplementary Information

## An optimized Nurr1 agonist provides disease-modifying effects in Parkinson's disease models

Woori Kim, Mohit Tripathi, Chunhyung Kim, Satyapavan Vardhini, Young Cha, Shamseer Kulangara Kandi, Melissa Feitosa, Rohit Kholiya, Eric Sah, Anuj Thakur, Yehan Kim, Sanghyeok Ko, Kaiya Bhatia, Sunny Manohar, Youngbin Kong, Gagandeep Sindhu, Yoon-Seong Kim, Bruce Cohen, Diwan S Rawat, Kwang-Soo Kim

### List of Supplementary Figures

- Supplementary Fig. 1. 4A7C-301 is brain-penetrant and potently activates Nurr1's transcriptional and neuroprotective function
- Supplementary Fig. 2. Effect of 4A7C-301 and other Nurr1 agonists on the transcriptional activities of mutant Nurr1-LBD constructs in SK-N-BE(2)C cells
- Supplementary Fig. 3. 4A7C-301 exhibits highly potent transactivation and neuroprotection compared to CQ
- Supplementary Fig. 4. Environmental (MPP<sup>+</sup>) and genetic ( $\alpha$ Syn) risk factors of PD compromise the level of Nurr1 but not those of other key transcription factors in MN9D cells
- Supplementary Fig. 5. Effects of CQ and 4A3C-301 on dopaminergic gene expression in MN9D cells and mouse ventral mesencephalic (VM) primary cells
- Supplementary Fig. 6. Comparison of CQ and 4A7C-301 for their suppressive function of LPS-induced *TNF $\alpha$*  gene expression in BV2 cells
- Supplementary Fig. 7. Altered autophagy process by CQ but not by 4A7C-301 in HeLa cell
- Supplementary Fig. 8. Assessment of motor and non-motor behaviors at the chronic stage (D14-D15) of MPTP-induced mice
- Supplementary Fig. 9. Recovery of motor and non-motor deficits by CQ and 4A7C-301 in AAV- $\alpha$ Syn-induced PD model mice
- Supplementary Fig. 10. Restoration of reduced DA levels by CQ and 4A7C-301 in MPTP- and  $\alpha$ Syn-induced mouse models

### List of Supplementary Tables

- Supplementary Table 1. Structure modification information, EC50 and maximal activity of top 36 compounds selected from > 570 4A7C-derivatives
- Supplementary Table 2. Primer sequences for site-directed mutagenesis for generation of constructs

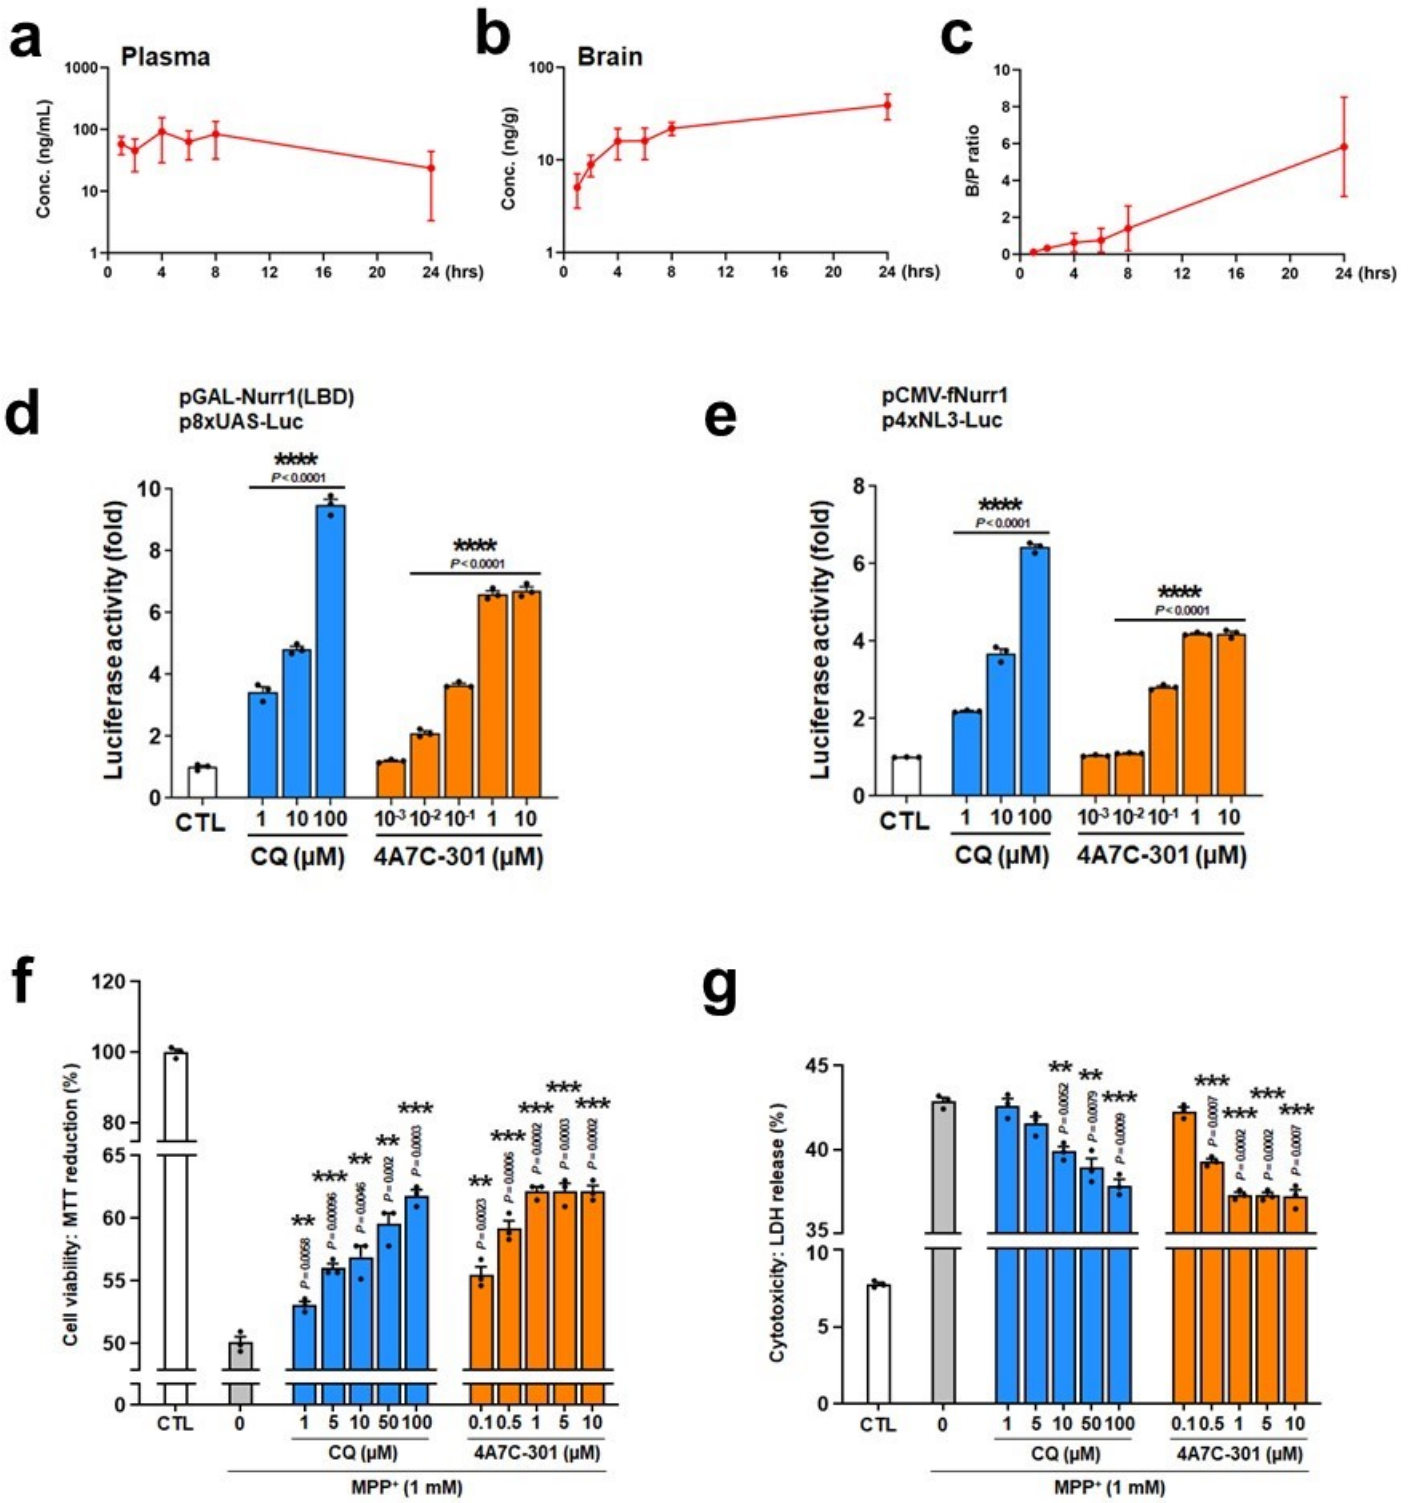

**h**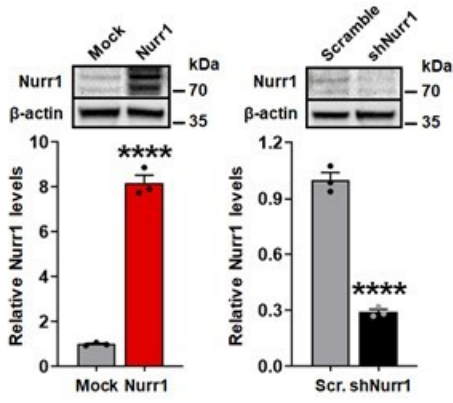**i**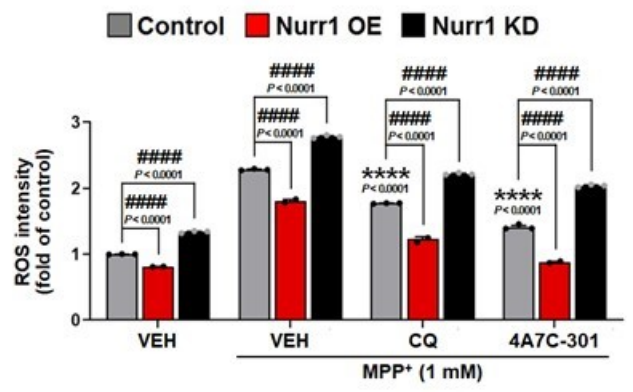**j**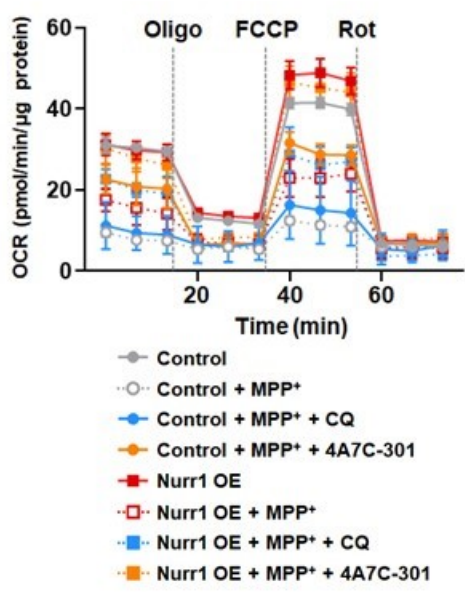**k**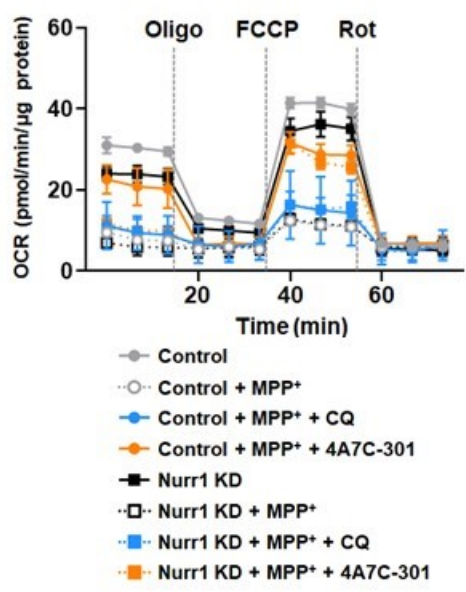**l**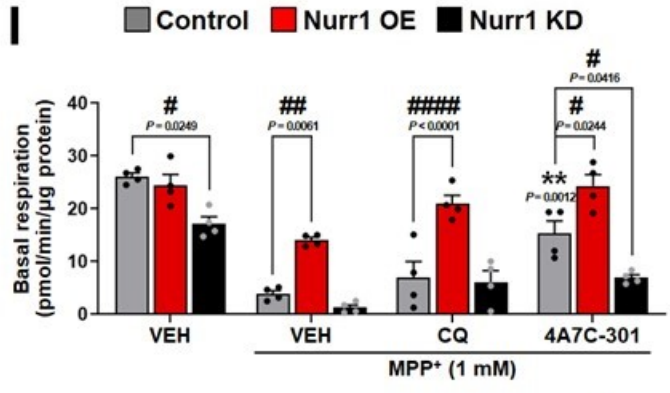**m**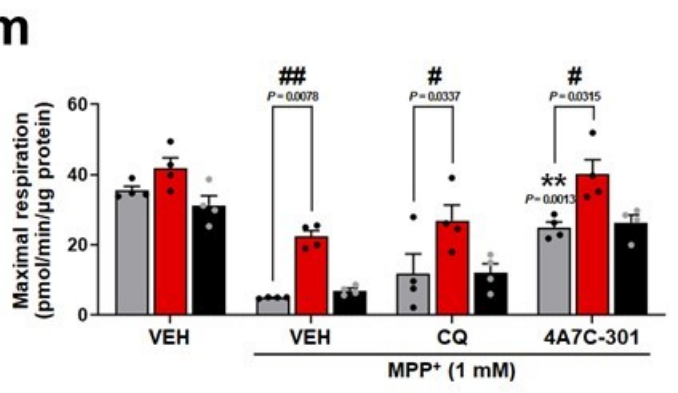**n**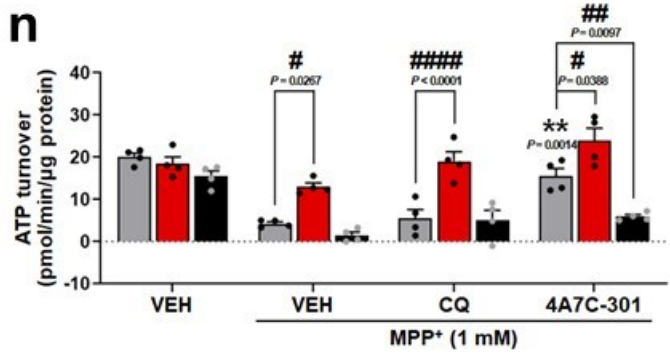**o**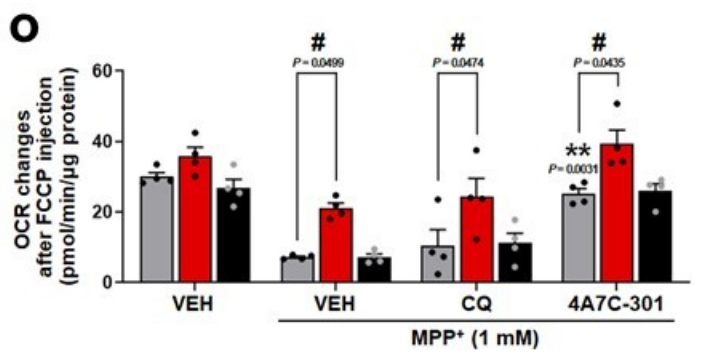

51 **Supplementary Fig. 1. 4A7C-301 is brain-penetrant and potently activates Nurr1's**  
52 **transcriptional and neuroprotective function.**

53 **a-c**, Blood-brain barrier (BBB) penetration analysis in SD rats ( $n = 3$ ) determined by LC-MS/MS  
54 (liquid chromatography-tandem mass spectrometry) in the plasma (**a**) and the brain (**b**). The  
55 brain/plasma ratio (B/P ratio) (**c**) was calculated at each time point. Data are mean  $\pm$  s.e.m.

56 **d,e**, Luciferase assays using Nurr1-LBD (**d**) or full-length Nurr1 (**e**) in N27-A cells.  $***P < 0.001$   
57 compared to CTL, two-way ANOVA, Dunnett's *post-hoc* test;  $n = 3$  biologically independent samples  
58 per group. Data are mean  $\pm$  s.e.m.

59 **f,g**, Cell viability and cytotoxicity measured by MTT reduction assay (**f**) and LDH release assay (**g**),  
60 respectively in N27-A cells.  $**P < 0.01$ ,  $***P < 0.001$  compared to  $0 \mu\text{M}$ , two-tailed unpaired *t*-test;  
61  $n = 3$  biologically independent samples per group. Data are mean  $\pm$  s.e.m.

62 **h**, Nurr1 expression levels in Nurr1 OE or KD N27-A cells.  $****P < 0.0001$ , Two-tailed Student's *t*-  
63 test;  $n = 3$  biologically independent samples per group. Data are mean  $\pm$  s.e.m.

64 **i**, ROS intensity detection by DCFDA staining in N27-A cells with Nurr1 OE or KD. Fluorescence  
65 intensity was normalized to control (Control VEH without MPP<sup>+</sup>).  $****P < 0.0001$  compared to VEH  
66 treatment under Control conditions;  $####P < 0.0001$ , two-way ANOVA, Tukey's *post-hoc* test;  $n = 3$   
67 biologically independent samples per group. Data are mean  $\pm$  s.e.m.

68 **j,k**, OXPHOS capacity measured using the Seahorse XFp analyzer in N27-A cells with Nurr1 OE (**j**)  
69 or KD (**k**).  $n = 4$  biologically independent samples per group. Data are mean  $\pm$  s.e.m.

70 **l-o**, Basal respiration (**l**), maximal respiration (**m**), ATP turnover (**n**), and OCR changes after FCCP  
71 injection (**o**) from N27-A cells with Nurr1 OE or KD shown in **j,k**.  $**P < 0.01$  compared to VEH  
72 treatment under Control condition;  $\#P < 0.05$ ,  $\#\#P < 0.01$ ,  $####P < 0.0001$  compared between each  
73 treatment group, two-way ANOVA, Tukey's *post-hoc* test;  $n = 4$  biologically independent samples  
74 per group. Data are mean  $\pm$  s.e.m.

75  
76  
77  
78  
79  
80  
81  
82  
83  
84  
85  
86  
87  
88

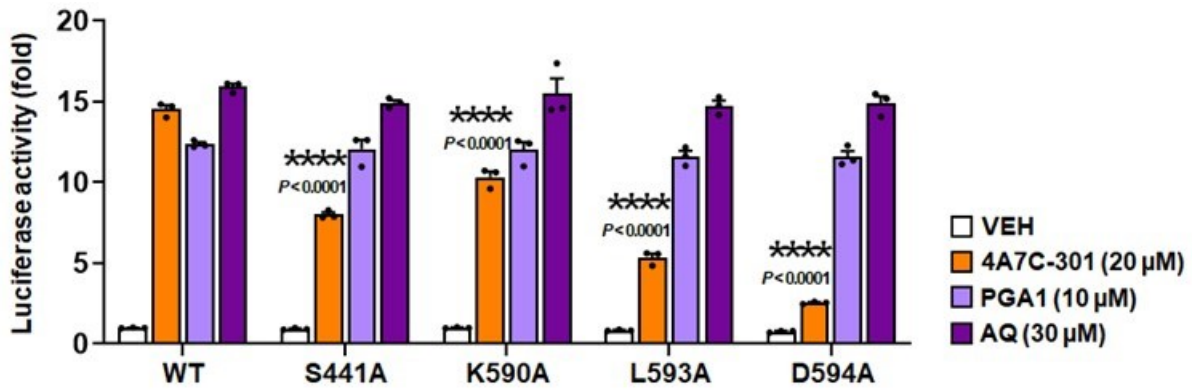

89  
90  
91  
92  
93  
94  
95  
96  
97  
98  
99  
100  
101  
102  
103  
104  
105  
106  
107  
108  
109  
110  
111  
112  
113

**Supplementary Fig. 2. Effect of 4A7C-301 and other Nurr1 agonists on the transcriptional activities of mutant Nurr1-LBD constructs in SK-N-BE(2)C cells.**

\*\*\* $P < 0.001$  compared to wild-type (WT). Two-way ANOVA, Dunnett's *post-hoc* test;  $n = 3$  biologically independent samples per group. Data are mean  $\pm$  s.e.m.

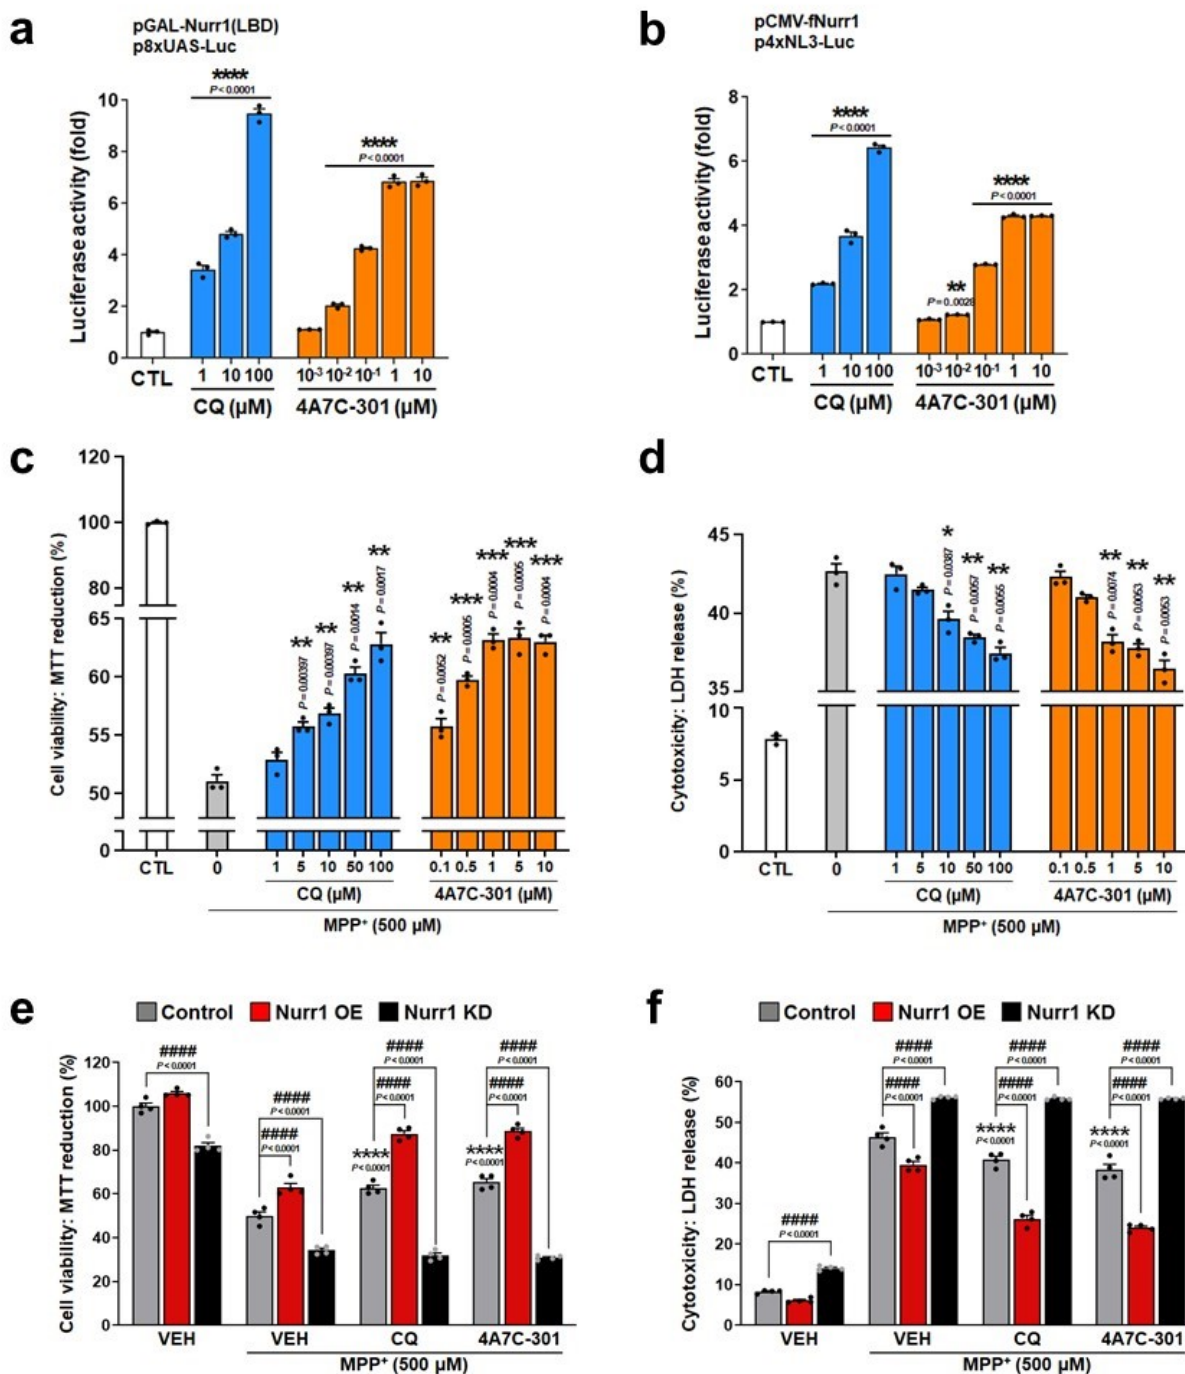

114 **Supplementary Fig. 3. 4A7C-301 exhibits highly potent transactivation and neuroprotection**  
 115 **compared to CQ.**

116 **a,b**, Luciferase assays using Nurr1-LBD (**a**) or full-length Nurr1 (**b**) in MN9D cells. \*\* $P < 0.01$ ,  
 117 \*\*\*\* $P < 0.0001$  compared to control (CTL), two-way ANOVA, Dunnett's *post-hoc* test;  $n = 3$   
 118 biologically independent samples per group. Data are mean  $\pm$  s.e.m.

119 **c,d**, Cell viability and cytotoxicity measured by MTT reduction assay (**c**) and LDH release assay (**d**),  
 120 respectively in MN9D cells. \* $P < 0.05$ , \*\* $P < 0.01$ , \*\*\* $P < 0.001$  compared to 0  $\mu\text{M}$ , two-tailed  
 121 unpaired *t*-test;  $n = 3$  biologically independent samples per group. Data are mean  $\pm$  s.e.m.

122 **e,f**, Cell viability analyzed by MTT reduction (**e**) and cytotoxicity measured using LDH release (**f**)  
 123 with Nurr1 OE and KD in MN9D cells. \*\*\*\* $P < 0.0001$  compared to vehicle (VEH) treatment under  
 124 Control conditions; ##### $P < 0.00001$ , two-way ANOVA, Tukey's *post-hoc* test;  $n = 4$  biologically  
 125 independent samples per group. Data are mean  $\pm$  s.e.m.

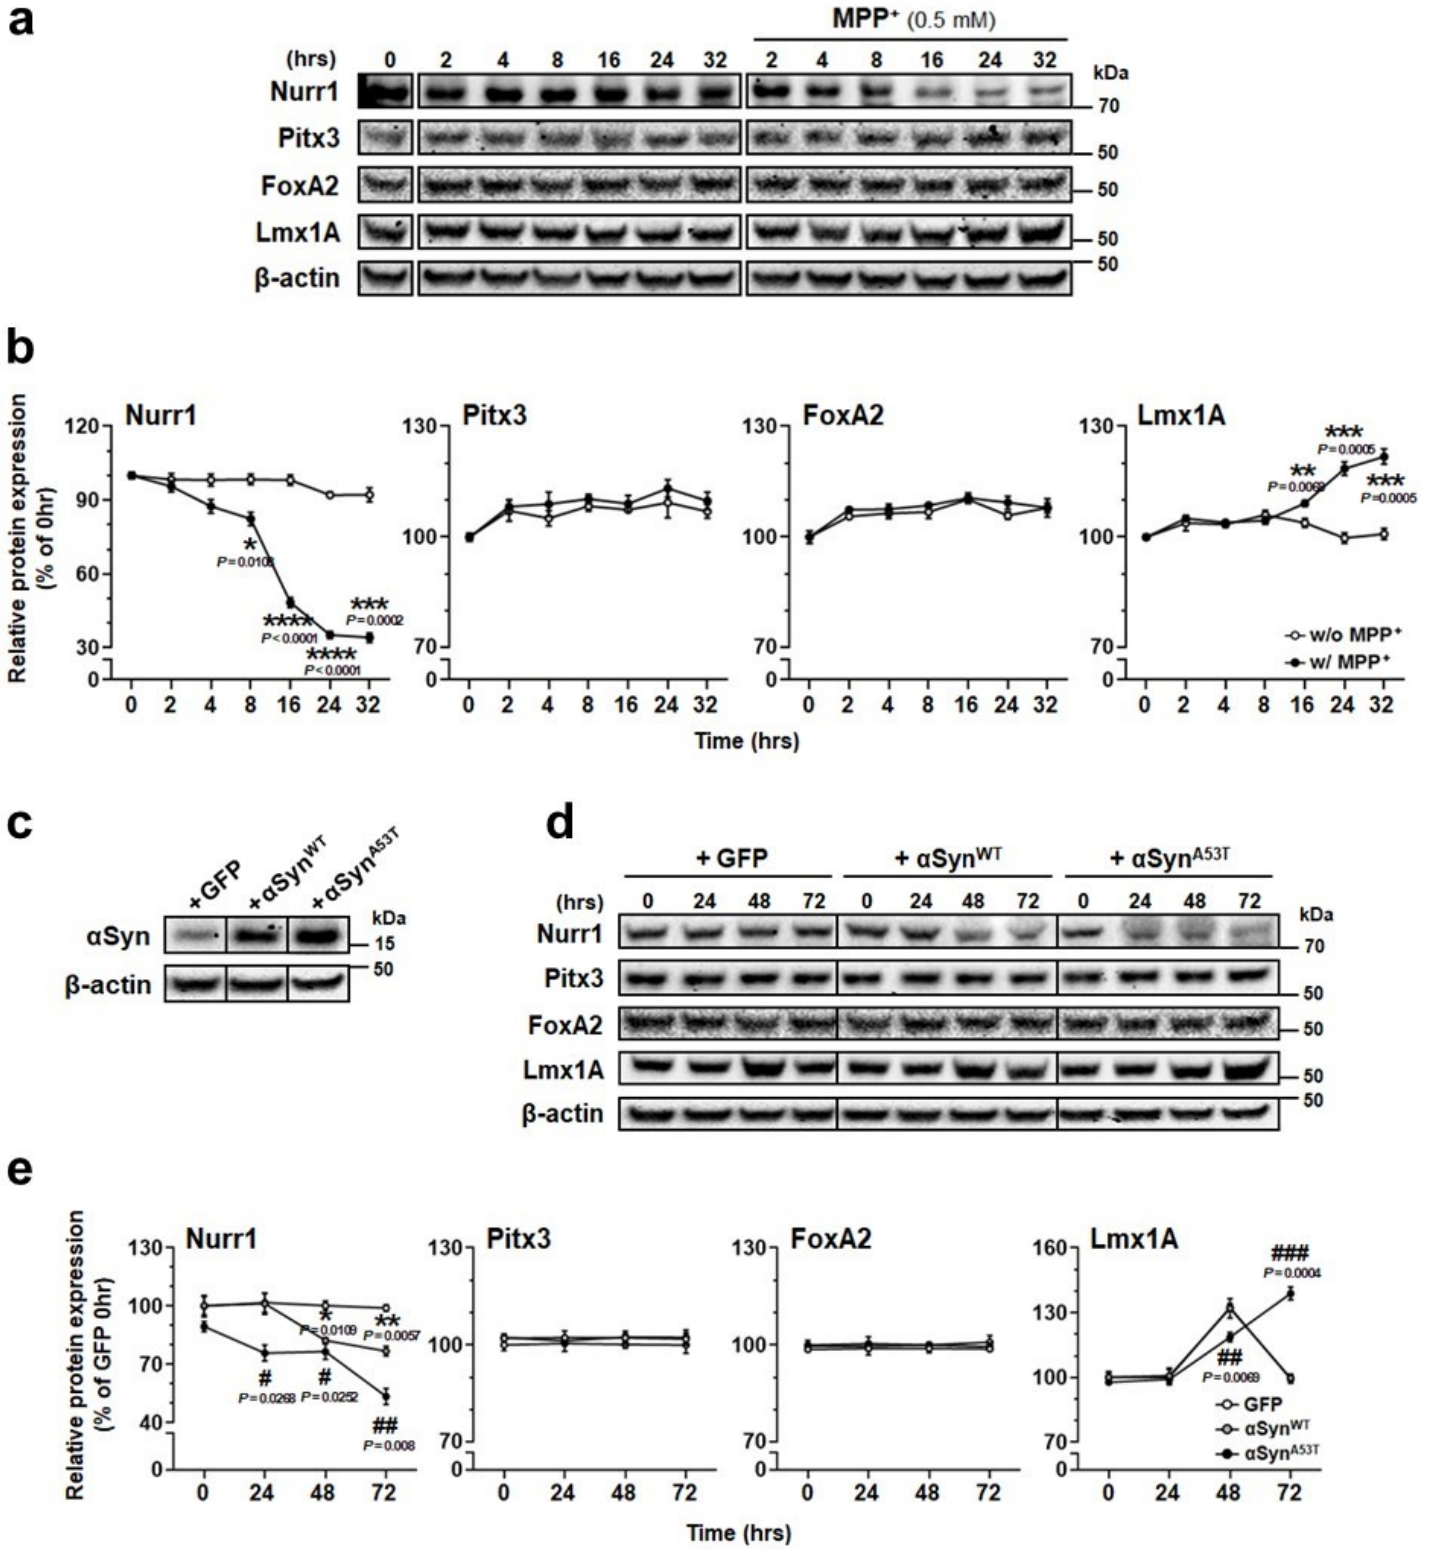

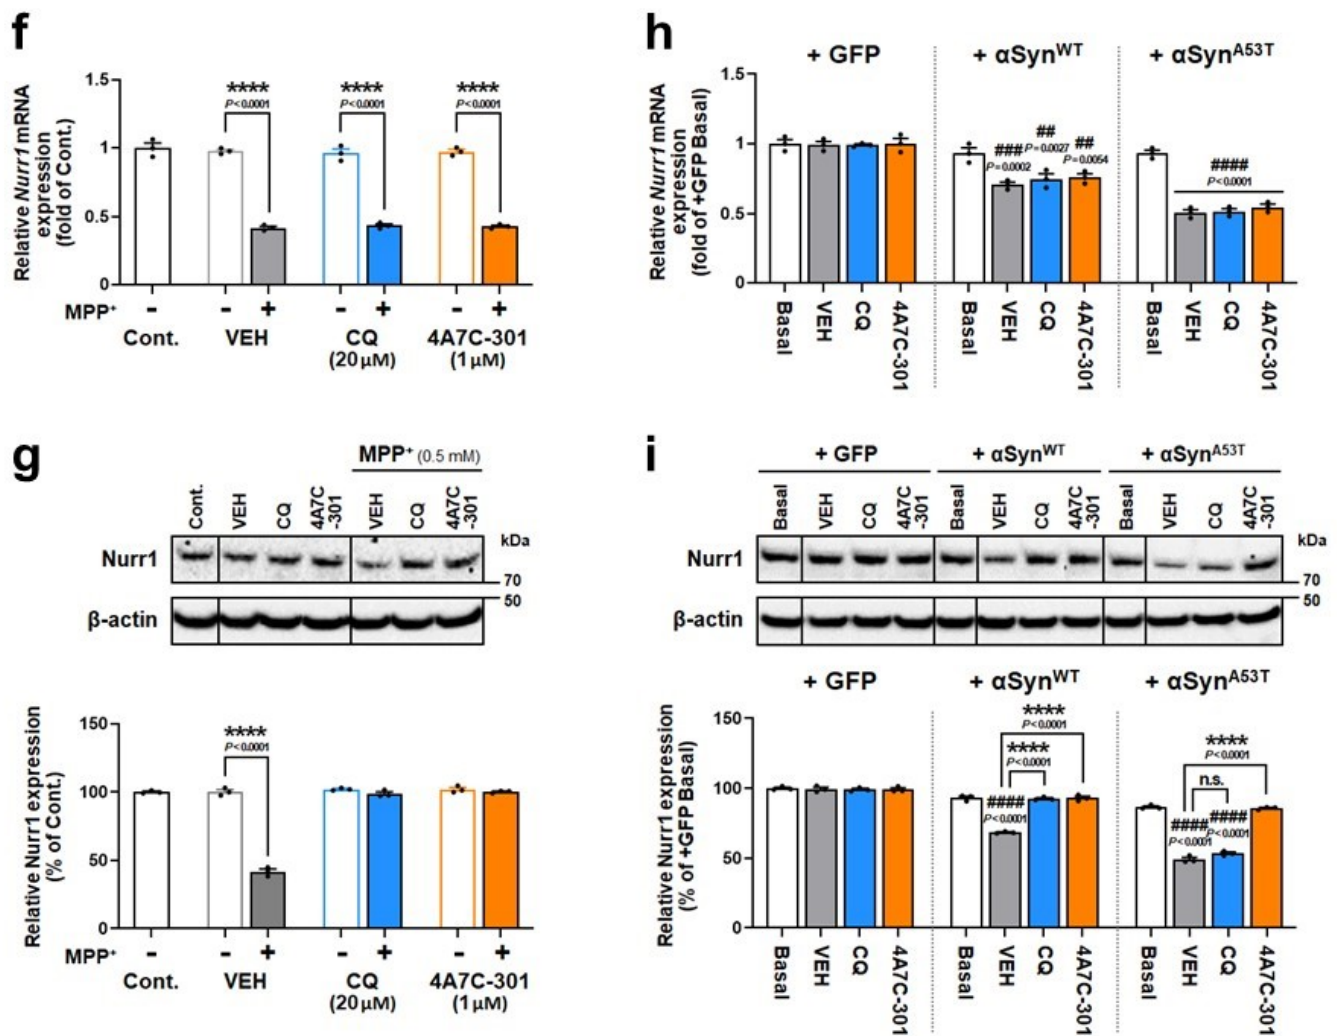

133

134

135

136 **Supplementary Fig. 4. Environmental (MPP<sup>+</sup>) and genetic (αSyn) risk factors of PD**  
 137 **compromise the level of Nurr1 but not those of other key transcription factors in MN9D cells.**

138 **a,b**, Western blot analyses of expression level changes of key mDANs transcription factors against  
 139 prolonged exposure to MPP<sup>+</sup>. \* $P < 0.05$ , \*\* $P < 0.01$ , \*\*\* $P < 0.001$ , \*\*\*\* $P < 0.0001$  compared to w/o  
 140 MPP<sup>+</sup>, two-way ANOVA, Sidak's multiple comparisons;  $n = 3$  biologically independent samples per  
 141 group. Data are mean  $\pm$  s.e.m.

142 **c-e**, Western blot analyses of expression level changes of key mDANs transcription factors against  
 143 overexpression of WT or mutant αSyn. \* $P < 0.05$ , \*\* $P < 0.01$  compared between GFP and WT αSyn  
 144 (αSyn<sup>WT</sup>); ## $P < 0.05$ , ### $P < 0.01$ , #### $P < 0.001$  compared between GFP and mutant αSyn (αSyn<sup>A53T</sup>),  
 145 two-way ANOVA, Sidak's multiple comparisons;  $n = 3$  biologically independent samples per group.  
 146 Data are mean  $\pm$  s.e.m.

147 **f,g**, Real-time PCR (**f**) and Western blot (**g**) analyses of Nurr1 expression changes after CQ or 4A7C-  
 148 301 treatment in the absence or presence of MPP<sup>+</sup>. \*\*\*\* $P < 0.0001$ , one-way ANOVA, Tukey's  
 149 multiple comparisons;  $n = 3$  biologically independent samples per group. Data are mean  $\pm$  s.e.m.

150 **h,i**, Real-time PCR (**h**) and Western blot (**i**) analyses of Nurr1 expression changes after CQ or 4A7C-  
 151 301 treatment under WT or mutant αSyn overexpression. ## $P < 0.01$ , ### $P < 0.001$ , #### $P < 0.0001$   
 152 compared to Basal; \*\*\*\* $P < 0.0001$ ; n.s., not significant ( $P > 0.05$ ), two-way ANOVA, Tukey's  
 153 multiple comparisons;  $n = 3$  biologically independent samples per group. Data are mean  $\pm$  s.e.m.



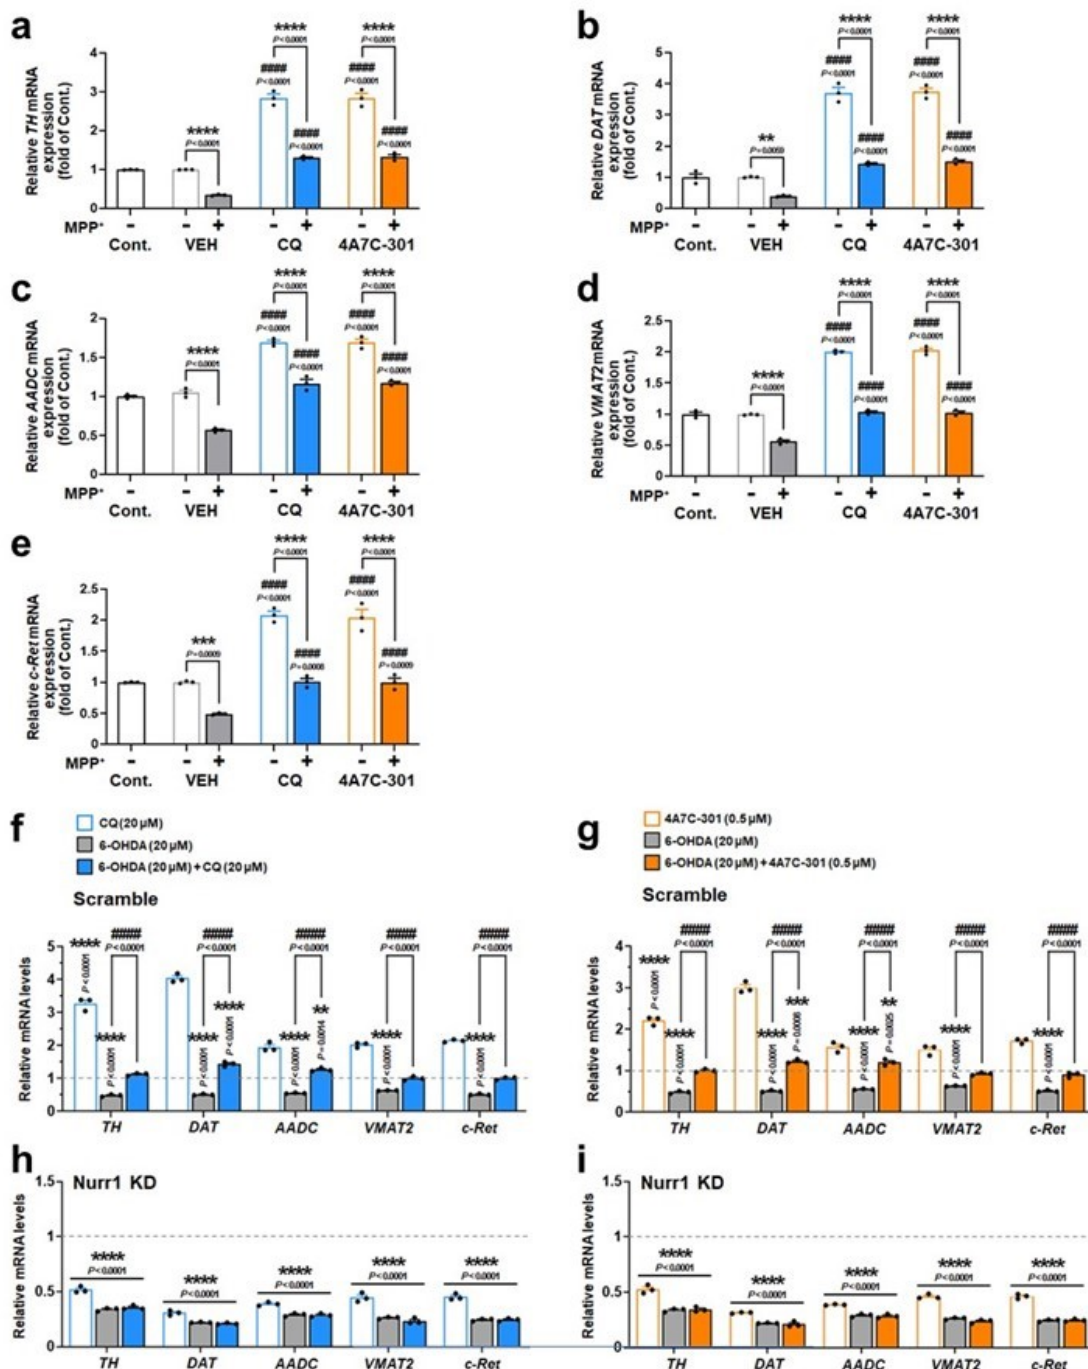

154 **Supplementary Fig. 5. Effects of CQ and 4A3C-301 on dopaminergic gene expression in MN9D**  
 155 **cells and mouse ventral mesencephalic (VM) primary cells.**

156 **a-e**, Real-time PCR analyses of tyrosine hydroxylase (*TH*) (a), dopamine transporter (*DAT*) (b),  
 157 aromatic L-amino acid decarboxylase (*AADC*) (c), vesicular monoamine transporter 2 (*VMAT2*) (d)  
 158 and *c-Ret* (e) expression after CQ or 4A7C-301 treatment in the absence or presence of MPP<sup>+</sup> in  
 159 MN9D cells. \*\**P* < 0.01, \*\*\**P* < 0.001, \*\*\*\**P* < 0.0001; #####*P* < 0.0001 compared to VEH. One-way  
 160 ANOVA, Dunnett's multiple comparisons; *n* = 3 biologically independent samples per group. Data  
 161 are mean ± s.e.m.

162 **f-i**, Real-time PCR analyses of *TH*, *DAT*, *AADC*, *VMAT2* and *c-Ret* expression after CQ or 4A7C-  
 163 **301** treatment in the absence or presence of 6-OHDA under normal (f,g) or Nurr1 knocked down (h,i)  
 164 conditions. in VM primary cells. #####*P* < 0.0001; \*\**P* < 0.01, \*\*\*\**P* < 0.0001 compared to VEH  
 165 treatment in Scramble condition. Two-way ANOVA, Dunnett's *post-hoc* test; *n* = 3 biologically  
 166 independent samples per group. Data are mean ± s.e.m.

167  
168  
169  
170  
171  
172  
173  
174  
175  
176  
177  
178  
179  
180  
181  
182  
183  
184  
185  
186  
187  
188  
189  
190  
191  
192  
193  
194  
195  
196  
197  
198  
199  
200  
201  
202  
203  
204  
205  
206  
207  
208  
209  
210  
211  
212  
213  
214  
215  
216

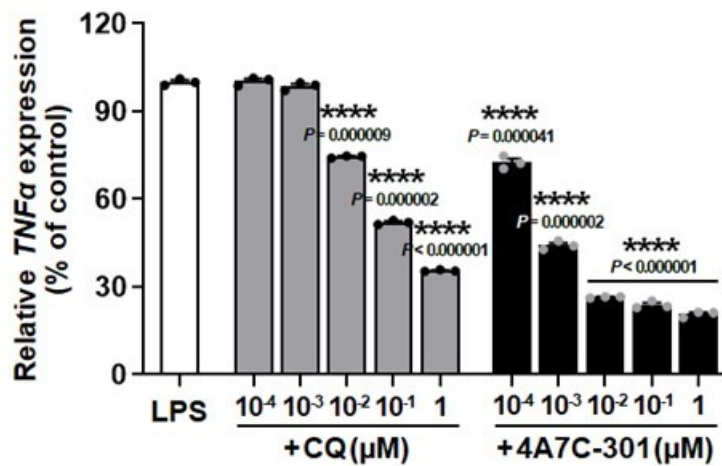

**Supplementary Fig. 6. Comparison of CQ and 4A7C-301 for their suppressive function of LPS-induced *TNFα* gene expression in BV2 cells.**

The Ct values to calculate the relative value of LPS-treated control group are 20.76 for *GAPDH* and 24.85 for *TNFα*. \*\*\*\* $P < 0.0001$  compared to LPS only, two-tailed unpaired *t*-test;  $n = 3$  biologically independent samples per group. Data are mean  $\pm$  s.e.m.

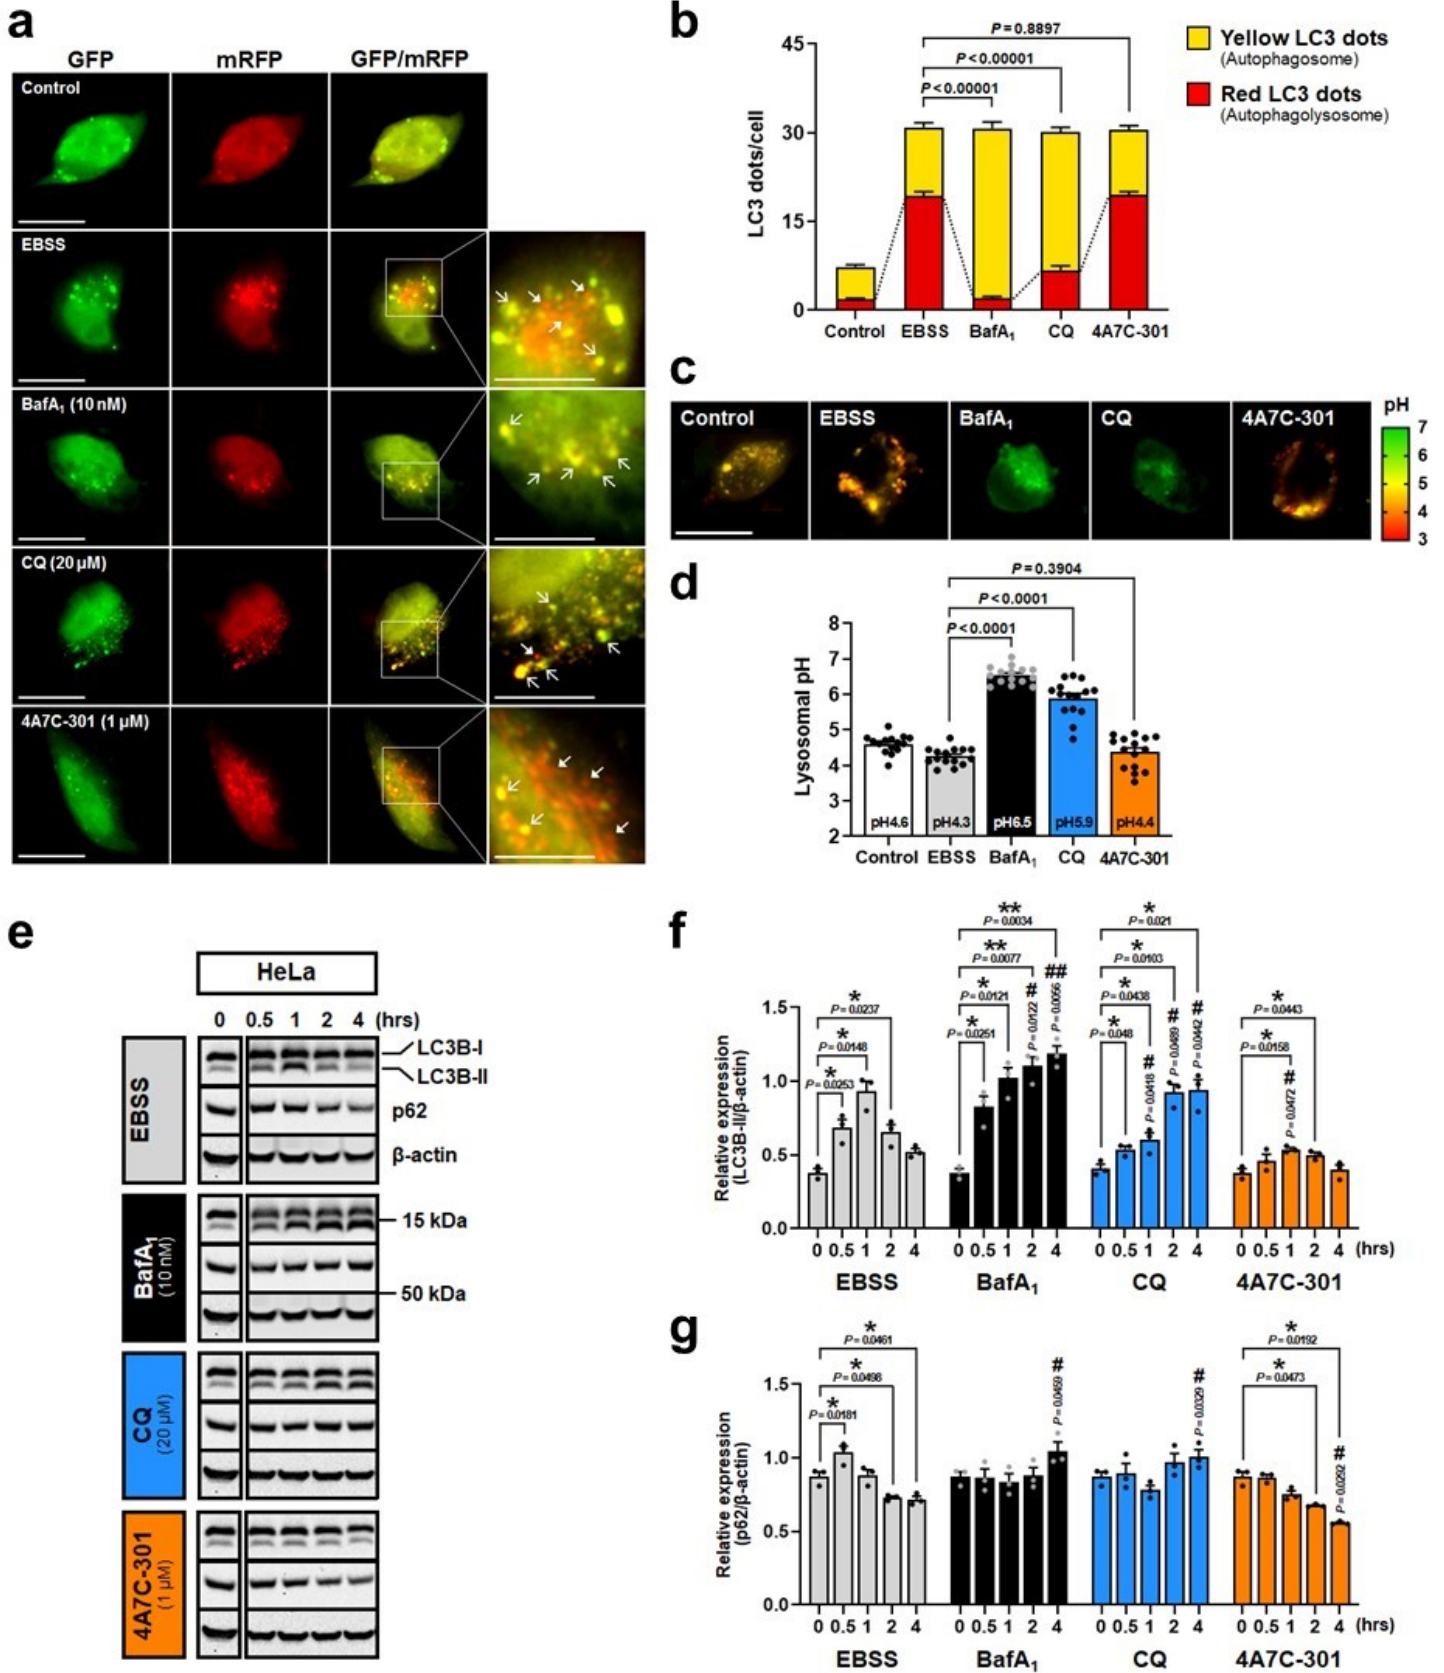

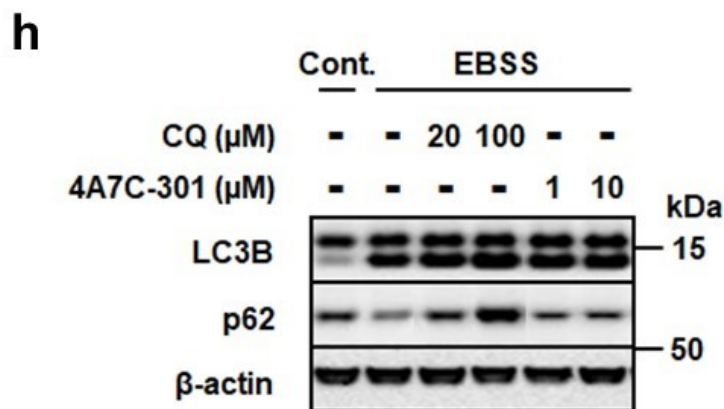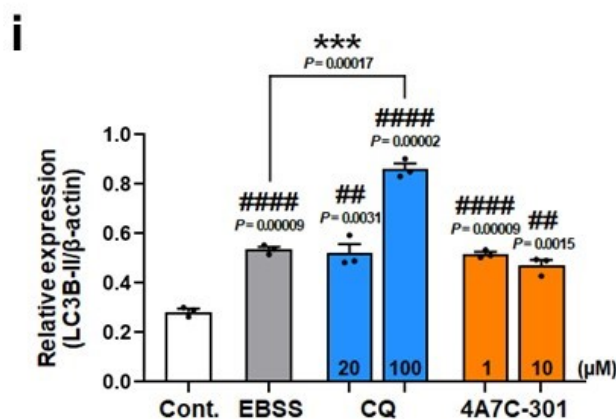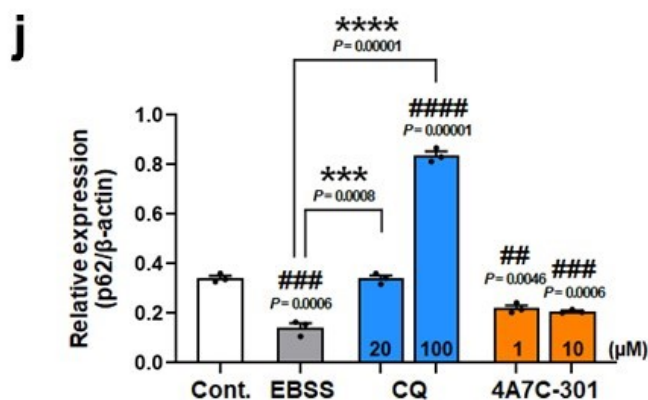

223  
224  
225  
226  
227  
228  
229  
230  
231  
232  
233  
234  
235  
236  
237  
238  
239  
240  
241  
242  
243  
244  
245

**Supplementary Fig. 7. Altered autophagy process by CQ but not by 4A7C-301 in HeLa cells.**

**a,b**, Autophagolysosome (APL) formation assay. **a**, Tandem mRFP-GFP-LC3 fluorescence images for APL detection. Scale bars, 20 μm. **b**, Number of yellow LC3 dots and red LC3 dots per cell was counted from 10 random cells in each well from triplicates for each condition (total of 30 cells per each group). Two-tailed unpaired *t*-test. Data are mean ± s.e.m.

**c,d**, Lysosomal pH detection. **c**, LysoSensor™ Yellow/Blue DND-160 fluorescence images. Scale bars, 20 μm. **d**, Quantification from 5 random cells in each well from triplicates for each treatment group (total of 15 cells per each group). Two-tailed unpaired *t*-test. Data are mean ± s.e.m.

**e-g**, Autophagic flux analyses. Autophagic flux markers LC3B and p62 (**e**) and its expression levels were quantified (**f,g**). \**P* < 0.05, \*\**P* < 0.01; #*P* < 0.05, ##*P* < 0.01 compared to EBSS, two-way ANOVA, Dunnett's multiple comparisons; *n* = 3 biologically independent samples per group. Data are mean ± s.e.m.

**h-j**, Effects of different concentrations of CQ and 4A7C-301 on autophagic flux in HeLa cells determined by Western blot (**h**) and quantification of LC3B-II (**i**) and p62 (**j**). ###*P* < 0.01, ####*P* < 0.001, #####*P* < 0.0001 compared to control (Cont.); \*\*\**P* < 0.001, \*\*\*\**P* < 0.0001 compared to EBSS, two-tailed unpaired *t*-test; *n* = 3 biologically independent samples per group. Data are mean ± s.e.m.

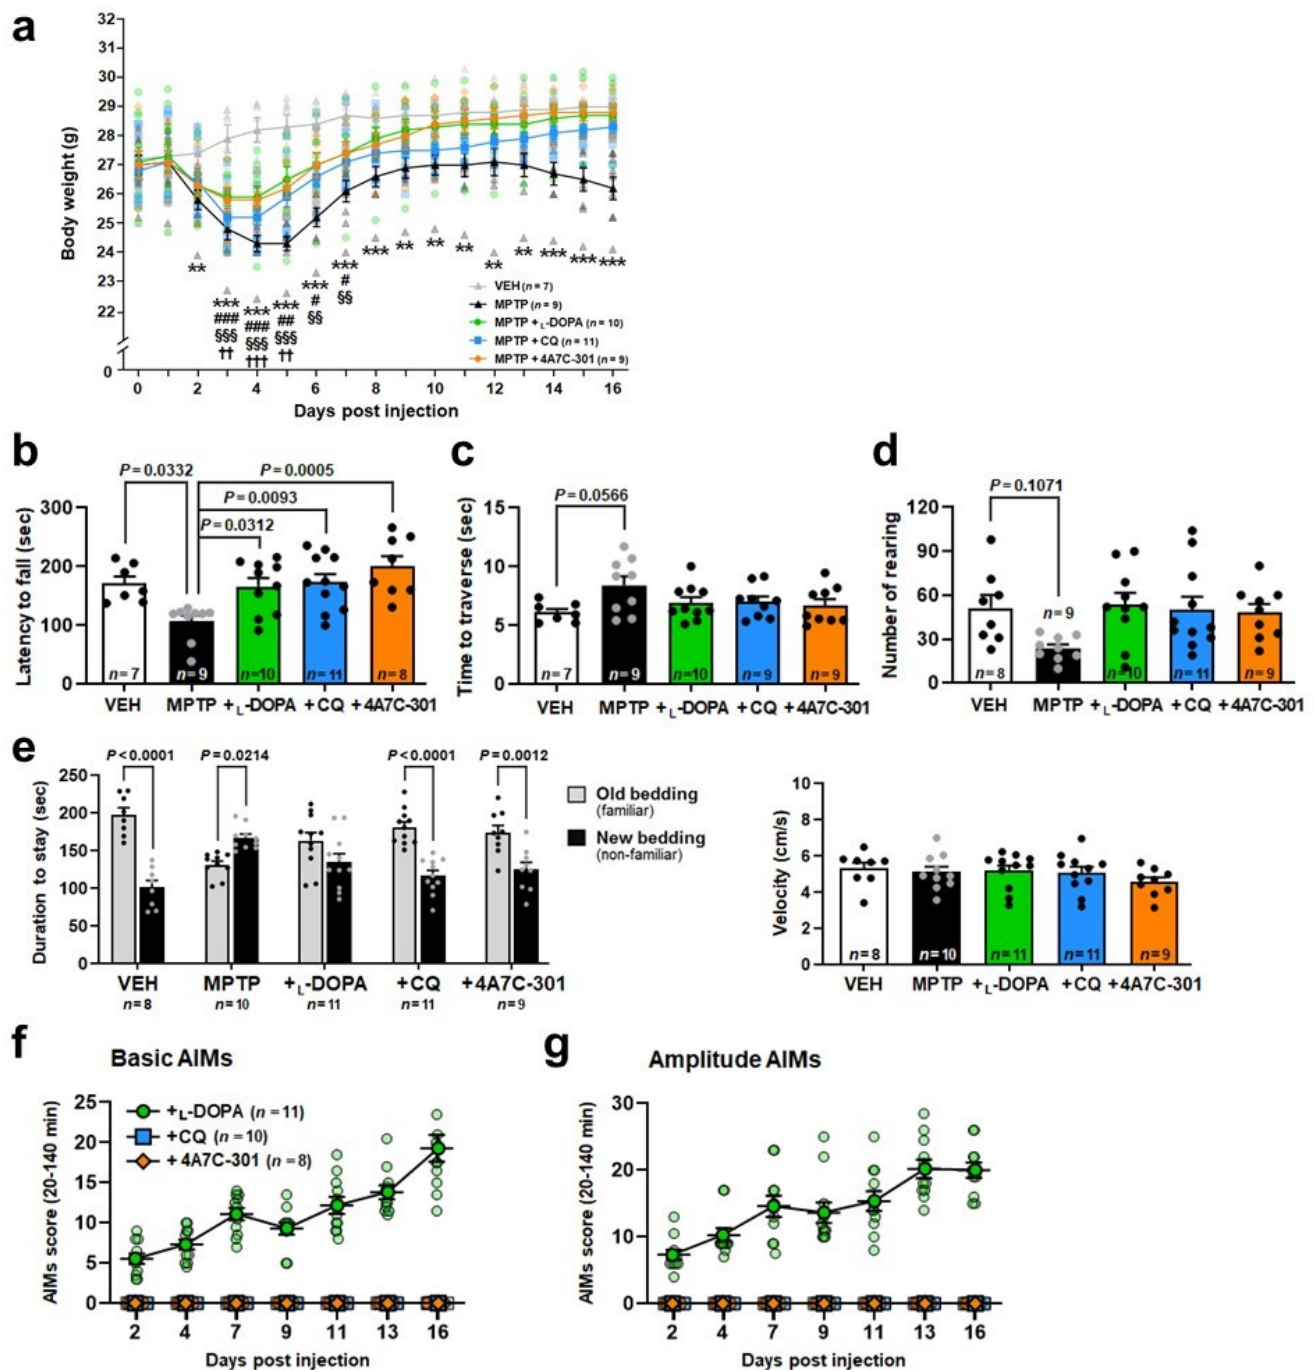

246 **Supplementary Fig. 8. Assessment of motor and non-motor behaviors at the chronic stage (D14-**  
 247 **D15) of MPTP-induced mice.**

248 **a**, Body weight changes of MPTP-induced PD model mice treated with vehicle (VEH), <sub>L</sub>-DOPA, CQ  
 249 or 4A7C-301. \*\* $P < 0.01$ , \*\*\* $P < 0.001$  compared between VEH and MPTP; # $P < 0.05$ , ## $P < 0.01$ ,  
 250 ### $P < 0.001$  compared between VEH and MPTP + <sub>L</sub>-DOPA; §§ $P < 0.01$ , §§§ $P < 0.001$  compared  
 251 between VEH and MPTP + CQ; †† $P < 0.01$ , ††† $P < 0.001$  compared between VEH and MPTP + 4A7C-  
 252 301. Two-way ANOVA, Sidak's *post-hoc* test. Data are mean  $\pm$  s.e.m.

253 **b-d**, Motor deficits-related behavior tests including rotarod (**b**), pole test (**c**), and cylinder test (**d**) at  
 254 the chronic stage (D15). \* $P < 0.05$  compared to VEH; One-way ANOVA, Tukey's *post-hoc* test;  $n \geq$   
 255 7 per group. Data are mean  $\pm$  s.e.m.

256 **e**, Olfactory discrimination (left) and velocity (right) at the chronic stage (D14). One-way ANOVA,  
 257 Tukey's *post-hoc* test;  $n \geq 7$  per group. Data are mean  $\pm$  s.e.m.

258 **f,g**, Basic (**f**) and amplitude (**g**) AIMs scores.  $n \geq 7$  per group. Data are mean  $\pm$  s.e.m.



276  
277  
278  
279  
280  
281  
282  
283

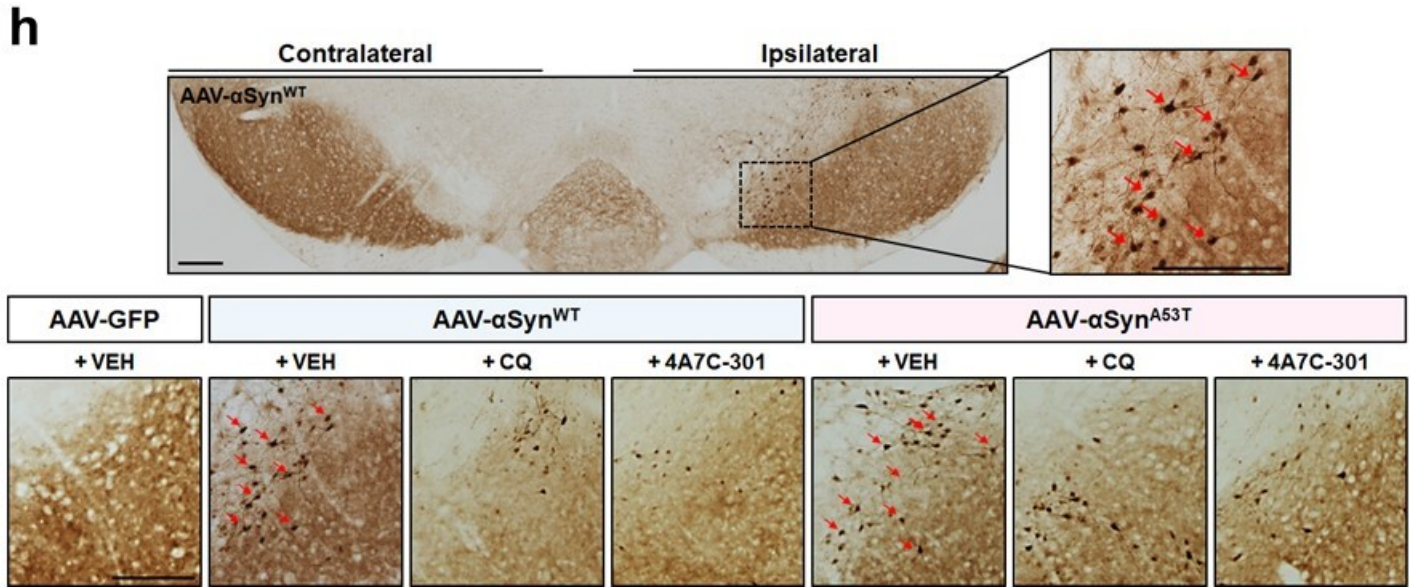

284  
285  
286  
287  
288  
289  
290  
291  
292  
293

294 **Supplementary Fig. 9. Recovery of motor and non-motor deficits by CQ and 4A7C-301 in AAV-  
295 αSyn-induced PD model mice.**

296 **a-d**, Rotarod test (**a,c**) and pole test (**b,d**) with CQ (**a,b**) or 4A7C-301 (**c,d**) treated group.  $^{\dagger}P < 0.05$ ,  
297  $^{\dagger\dagger}P < 0.01$  compared between GV and WV;  $^{***}P < 0.001$ ,  $^{****}P < 0.0001$  compared between GV  
298 and AV;  $^{\#}P < 0.05$  compared WV to WC or W301;  $^{\$}P < 0.01$ ,  $^{\$ \$ \$ \$}P < 0.0001$  compared AV to AC  
299 or A301. Two-way ANOVA, Tukey's multiple comparisons;  $n = 8$  per group. Data are mean  $\pm$  s.e.m.  
300 **e,f**, Olfactory discrimination tests performed at 4 weeks (**e**) and 6 weeks (**f**) after surgery. Evident  
301 olfactory dysfunction by  $\alpha\text{Syn}^{\text{WT}}$  or  $\alpha\text{Syn}^{\text{A53T}}$  expression is observed from 4 weeks after surgery. Two-  
302 way ANOVA, Tukey's multiple comparisons;  $n = 8$  per group. Data are mean  $\pm$  s.e.m. GV, GFP +  
303 VEH; WV,  $\alpha\text{Syn}^{\text{WT}}$  + VEH; AV,  $\alpha\text{Syn}^{\text{A53T}}$  + VEH; WC,  $\alpha\text{Syn}^{\text{WT}}$  + CQ; AC,  $\alpha\text{Syn}^{\text{A53T}}$  + CQ; W301,  
304  $\alpha\text{Syn}^{\text{WT}}$  + 4A7C-301; A301,  $\alpha\text{Syn}^{\text{A53T}}$  + 4A7C-301.

305 **g**, Velocities during the session at 4 weeks and 6 weeks. *n.s.*, not significant ( $P > 0.05$ ), one-way  
306 ANOVA;  $n = 8$  per group. Data are mean  $\pm$  s.e.m.

307 **h**, Representative pS129 immunohistochemistry from two independent experiments in the SNpc.  
308 Arrows indicate pS129<sup>+</sup> cells. Bottom panel is presented in Fig. 5l. Scale bars, 250  $\mu\text{m}$ .

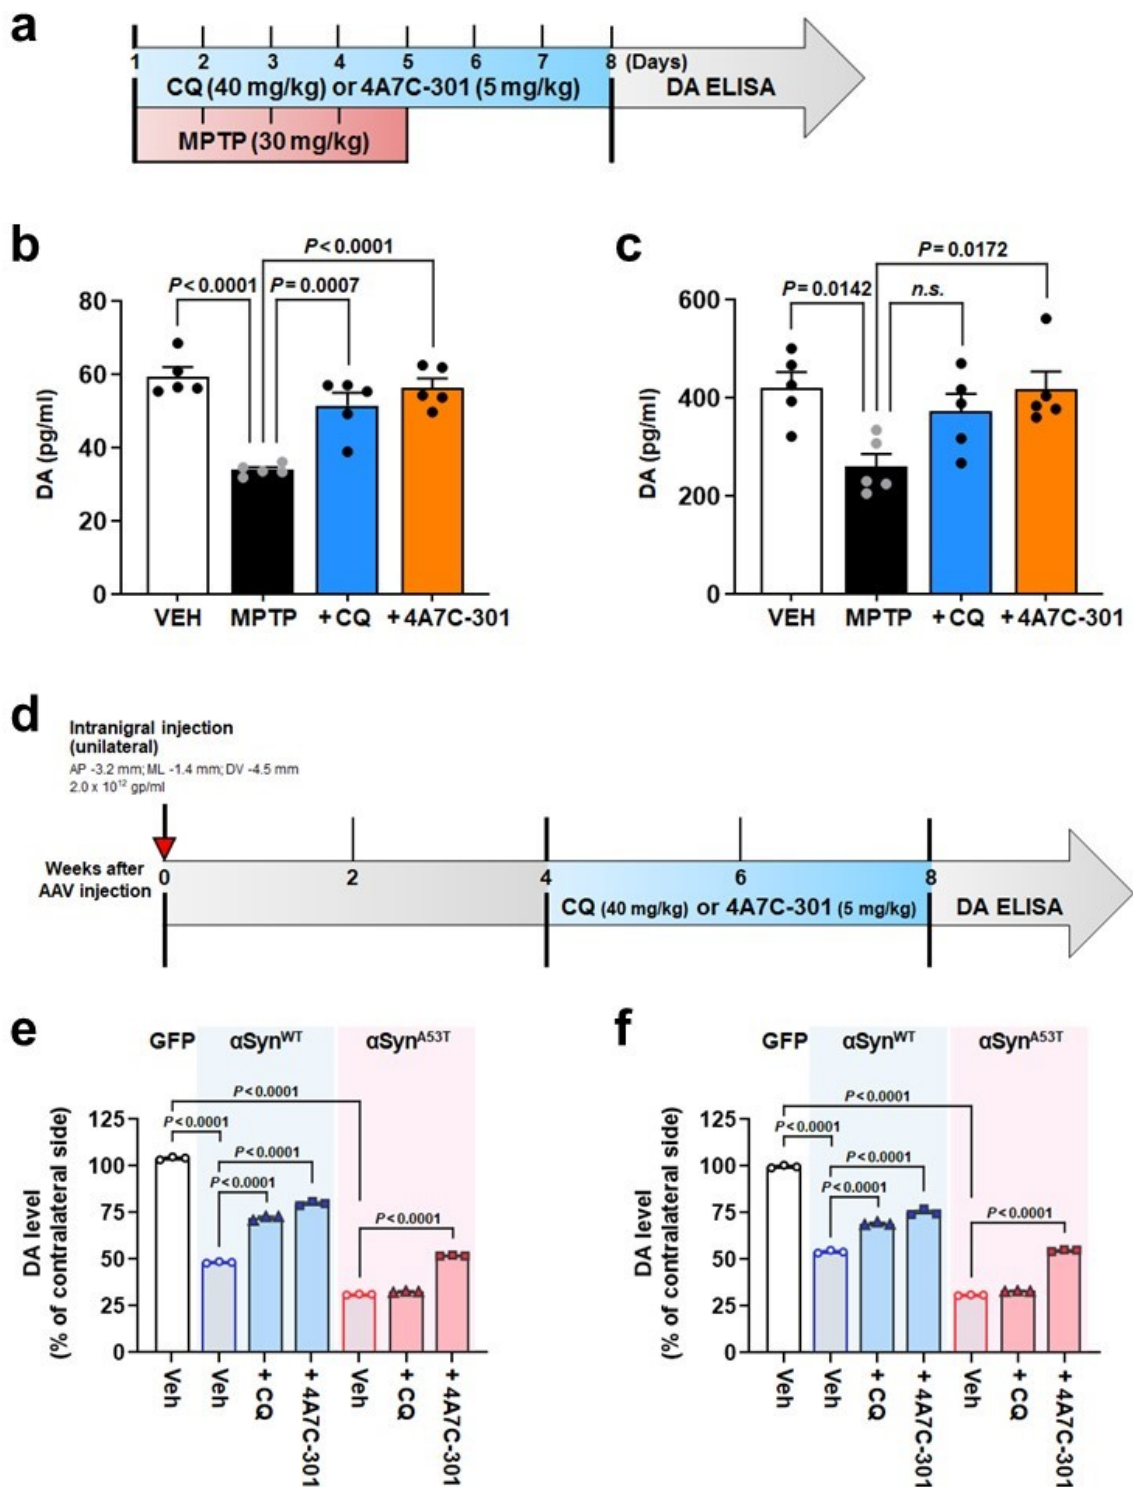

309

310 **Supplementary Fig. 10. Restoration of reduced DA levels by CQ and 4A7C-301 in MPTP- (a-c)**  
 311 **and  $\alpha$ Syn-induced (d-f) mouse models.**

312 **a**, Schematic representation of CQ and 4A7C-301 administrations to MPTP-treated mice.

313 **b,c**, DA ELISA in the SN (**b**) and STR (**c**). *n.s.*, not significant ( $P > 0.05$ ). One-way ANOVA, Tukey's  
 314 *post-hoc* test;  $n = 5$  per group. Data are mean  $\pm$  s.e.m.

315 **d**, Schematic representation of CQ and 4A7C-301 administrations to AAV- $\alpha$ Syn-injected mice.

316 **e,f**, DA ELISA in the SN (**e**) and STR (**f**). One-way ANOVA, Tukey's *post-hoc* test;  $n = 3$  per group.  
 317 Data are mean  $\pm$  s.e.m.



**Supplementary Table 1.** Structure modification information, EC<sub>50</sub> and maximal activity of top 36 compounds selected from > 570 4A7C-derivatives.

| S. No. | ID              | Pyrimidine regiochemistry | Linker | Pyrimidine substituent R <sub>1</sub> | Pyrimidine substituent R <sub>2</sub> | EC <sub>50</sub>  | Maximum fold activity |
|--------|-----------------|---------------------------|--------|---------------------------------------|---------------------------------------|-------------------|-----------------------|
|        | CQ              | -                         | -      | -                                     | -                                     | 50.25 ± 11-13 μM  | 16.84 ± 2.57          |
| 1      | 4A7C-101        | Regiomer-1                |        | Me                                    | Piperidine                            | 121.22 ± 56.69 nM | 5.08 ± 0.70           |
| 2      | 4A7C-102        | Regiomer-1                |        | Me                                    | N-Et piperazine                       | 143.13 ± 2.88 nM  | 3.68 ± 0.04           |
| 3      | 4A7C-103        | Regiomer-2                |        | Cl                                    | N-Ethyl piperazine                    | 634.46 ± 1.37 nM  | 3.52 ± 0.19           |
| 4      | 4A7C-104        | Regiomer-2                |        | Cl                                    | N-Ethyl piperazine                    | 315.67 ± 39.76 nM | 2.63 ± 0.58           |
| 5      | 4A7C-201        | Regiomer-1                |        | Me                                    | N-Methyl piperazine                   | 14.59 ± 1.38 nM   | 4.78 ± 0.31           |
| 6      | 4A7C-202        | Regiomer-1                |        | Me                                    | Pyrrolidine                           | 1.28 ± 0.63 nM    | 3.78 ± 0.25           |
| 7      | 4A7C-203        | Regiomer-1                |        | H                                     | Cl                                    | 17.02 ± 4.97 nM   | 4.22 ± 0.16           |
| 8      | 4A7C-204        | Regiomer-1                |        | H                                     | Thiomorpholine                        | 33.69 ± 0.34 nM   | 4.46 ± 0.67           |
| 9      | 4A7C-205        | Regiomer-1                |        | H                                     | 1H-Imidazole                          | 1.32 ± 0.31 μM    | 4.64 ± 0.21           |
| 10     | 4A7C-206        | Regiomer-1                |        | H                                     | N-Ethyl piperazine                    | 10.03 ± 0.76 μM   | 10.71 ± 0.44          |
| 11     | 4A7C-508        | Regiomer-2                |        | H                                     | Thiomorpholine                        | 1.46 ± 0.97 μM    | 5.50 ± 0.14           |
| 12     | 4A7C-509        | Regiomer-2                |        | H                                     | 1H-Imidazole                          | 112.57 ± 19.21 nM | 3.43 ± 0.42           |
| 13     | <b>4A7C-301</b> | Regiomer-2                |        | N-Et Piperazine                       | N-Et Piperazine                       | 6.53 ± 0.33 μM    | 18.12 ± 3.02          |
| 14     | 4A7C-302        | Regiomer-2                |        | Piperidine                            | Piperidine                            | 950.63 ± 6.03 nM  | 5.19 ± 0.18           |

|    |          |                  |                                                                                     |                 |                 |                   |              |
|----|----------|------------------|-------------------------------------------------------------------------------------|-----------------|-----------------|-------------------|--------------|
| 15 | 4A7C-303 | Regiomer-1       | 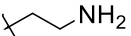   | N-Et Piperazine | N-Et Piperazine | 8.50 ± 18.62 nM   | 9.50 ± 0.22  |
| 16 | 4A7C-304 | Regiomer-2       |    | Piperidine      | N-Et Piperazine | 9.67 ± 7.87 nM    | 2.16 ± 0.03  |
| 17 | 4A7C-305 | Regiomer-2       |    | Morpholine      | N-Et Piperazine | 1.04 ± 4.19 μM    | 7.60 ± 0.08  |
| 18 | 4A7C-306 | Regiomer-2       |    | N-Me Piperazine | N-Et Piperazine | 25.46 ± 42.21 nM  | 10.01 ± 0.06 |
| 19 | 4A7C-401 | Quinazoline ring |    | NA              | N-Et Piperazine | 2.62 ± 0.96 nM    | 3.01 ± 0.13  |
| 20 | 4A7C-501 | Regiomer-1       |    | Me              | N-Me Piperazine | 3.39 ± 0.26 μM    | 10.51 ± 0.85 |
| 21 | 4A7C-502 | Regiomer-1       |    | Me              | Cl              | 0.51 ± 0.06 nM    | 4.99 ± 0.86  |
| 22 | 4A7C-503 | Regiomer-2       |    | Me              | Morpholine      | 1.07 ± 0.12 nM    | 2.25 ± 0.26  |
| 23 | 4A7C-504 | Regiomer-2       |  | Me              | N-Me Piperazine | 431.29 ± 15.14 nM | 4.07 ± 0.53  |
| 24 | 4A7C-505 | Regiomer-1       |  | Me              | Piperidine      | 2.14 ± 0.45 nM    | 3.65 ± 0.31  |
| 25 | 4A7C-506 | Regiomer-1       |  | Me              | Morpholine      | 9.83 ± 0.29 nM    | 4.49 ± 0.43  |
| 26 | 4A7C-507 | Regiomer-2       |  | Me              | N-Et Piperazine | 94.87 ± 1.66 nM   | 3.24 ± 0.40  |
| 27 | 4A7C-508 | Regiomer-2       |  | Me              | Thiomorpholine  | 1.54 ± 0.42 μM    | 5.29 ± 0.06  |
| 28 | 4A7C-601 | Regiomer-1       |  | Me              | Cl              | 109.82 ± 27.07 nM | 3.81 ± 0.17  |

|    |          |            |                                                                                     |    |                 |                |             |
|----|----------|------------|-------------------------------------------------------------------------------------|----|-----------------|----------------|-------------|
| 29 | 4A7C-602 | Regiomer-1 | 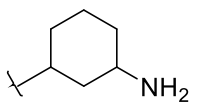   | Me | N-Ph Piperazine | 3.86 ± 0.26 μM | 3.44 ± 0.28 |
| 30 | 4A7C-603 | Regiomer-1 |    | Me | Piperidine      | 1.22 ± 0.02 μM | 6.84 ± 0.52 |
| 31 | 4A7C-604 | Regiomer-2 |    | Me | Pyrrolidine     | 1.03 ± 0.42 μM | 4.24 ± 0.45 |
| 32 | 4A7C-605 | Regiomer-1 |    | Me | Morpholine      | 1.08 ± 0.37 μM | 5.71 ± 0.81 |
| 33 | 4A7C-606 | Regiomer-2 |    | Me | Thiomorpholine  | 1.54 ± 0.36 μM | 5.72 ± 0.16 |
| 34 | 4A7C-607 | Regiomer-2 |    | Me | N-Me Piperazine | 2.23 ± 0.40 μM | 4.50 ± 1.59 |
| 35 | 4A7C-608 | Regiomer-2 |    | Me | N-Ph Piperazine | 1.14±0.13μM    | 6.31 ± 0.82 |
| 36 | 4A7C-609 | Regiomer-2 |  | Me | Piperidine      | 1.19 ± 0.61 μM | 4.83 ± 0.51 |

**Supplementary Table 2.** Primer sequences for site-directed mutagenesis for generation of constructs. The underlined nucleotide in the sequences of primers used to perform site-directed mutagenesis are the ‘mutated’ bases.

| Primer name   | Primer sequences (5'-3')                                 |
|---------------|----------------------------------------------------------|
| mNurr-S441A_S | CAGGACCTGCTTTTTGAAG <u>C</u> AGCTTTCTTAGAATTATTTG        |
| mNurr-S441A_A | CAAATAATTCTAAGAAAGCTG <u>C</u> TTCAAAAAGCAGGTCCTG        |
| mNurr-I573A_S | TGCACACAGGGCCTCCAGCG <u>C</u> GCTTTCTACCTGAAATTGGAAGAC   |
| mNurr-I573A_A | GTCTTCCAATTTCAAGGTAGAAAG <u>C</u> GCGCTGGAGGCCCTGTGTGCA  |
| mNurr-A586F_S | GAAGACTTGGTACCACCACCATTTATAATTGACAACTTTTCCTG             |
| mNurr-A586F_A | CAGGAAAAGTTTGTCAATTATA <u>AA</u> TGGTGGTGGTACCAAGTCTTC   |
| mNurr-I588A_S | GTACCACCACCAGCAATAG <u>C</u> TGACAACTTTTCCTGGAC          |
| mNurr-I588A_A | GTCCAGGAAAAGTTTGTCA <u>G</u> CTATTGCTGGTGGTGGTAC         |
| mNurr-K590A_S | CCACCACCAGCAATAATTGAC <u>G</u> CACTTTTCCTGGACACCTTACCT   |
| mNurr-K590A_A | AGGTAAGGTGTCCAGGAAAAGT <u>G</u> CGTCAATTATTGCTGGTGGTGG   |
| mNurr-L593A_S | GCAATAATTGACAACTTTTC <u>G</u> CGGACACCTTACCT TTCTAAACG   |
| mNurr-L593A_A | CGTTTAGAAAGGTAAGGTGTCC <u>G</u> CGAAAAGTTTGTCAATTATTGC   |
| mNurr-D594A_S | ATAATTGACAACTTTTCCTGG <u>C</u> CACCTTACCT TTCTAAACGCGT   |
| mNurr-D594A_A | ACGCGTTTAGAAAGGTAAGGTG <u>G</u> CCAGGAAAAGTTTGTCAATTAT   |
| mNurr-T595A_S | GACAACTTTTCCTGGAC <u>G</u> CCTTACCTTTCTAAACGCGTGAT       |
| mNurr-T595A_A | ATCACGCGTTTAGAAAGGTAAGG <u>C</u> GTCCAGGAAAAGTTTGTGTC    |
| mNurr-L596A_S | GACAACTTTTCCTGGACAC <u>G</u> CCTTTCTAAACGCGTGATCAG       |
| mNurr-L596A_A | CTGATCACGCGTTTAGAAAGGT <u>G</u> CGGTGTCCAGGAAAAGTTTGTGTC |
| mNurr-F598A_S | CTTTTCCTGGACACCTTACCT <u>G</u> CCTAAACGCGTGATCAGCTGTTC   |
| mNurr-F598A_A | GAACAGCTGATCACGCGTTTAG <u>G</u> CAGGTAAGGTGTCCAGGAAAAG   |
